# Supplementary material for: Extinction risk and conservation of the world’s sharks and rays
Source: eLife. 2014 Jan 21;3:e00590. doi: 10.7554/eLife.00590 (PMC3897121; doi:10.7554/eLife.00590)
Supplement: Supplementary file 2. — (A) IUCN Red List status of chondrichthyans in the fin trade, including (i) families with the most-valued fins, and (ii) the most prevalent species utilized in the Hong Kong fin trade. (B) Chondrichthyan species threatened by (i) control measures, and (ii) habitat destruction and degradation, pollution or climate change with the corresponding IUCN threat classification (Salafsky et al., 2008). (C) Irreplaceable: the 66 threatened endemic sharks and rays ordered in decreasing irreplaceability. DOI: http://dx.doi.org/10.7554/eLife.00590.025 [file elife-00590-supp2.xlsx]

## Sheet: A
Supplementary File 2A. Red List status of chondrichthyans in the fin trade, including (i) families with the most-valued fins, and (ii) the most prevalent species utilized in the Hong Kong fin trade.
Family	Common name	Species name	IUCN Red List category	Source
(i) Species with most valued fins
Pristidae	sawfishes	e.g. Anoxypristis cuspidata	7 CR	(Anonymous, 2007, Clarke et al., 2007)
Rhynchobatidae	wedgefishes	e.g. Rhynchobatus australiae	1 EN, 1 VU	(Clarke et al., 2007)
Rhinidae	Shark ray	Rhina ancylostoma	VU	(Clarke et al., 2007)
Rhinobatidae	guitarfishes	e.g. Rhinobatos albomaculatus	1 CR, 2 EN, 8 VU, 7 NT, 3 LC, 15 DD	(Clarke et al., 2007)
(ii) Most prevalent species
Carcharhinidae	Silky shark	Carcharhinus falciformis	NT	(Clarke et al., 2006)
Carcharhinidae	Bull shark	Carcharhinus leucas	NT	(Clarke et al., 2006)
Carcharhinidae	Oceanic Whitetip shark	Carcharhinus longimanus	VU	(Clarke, 2008)
Carcharhinidae	Dusky shark	Carcharhinus obscurus	VU	(Clarke et al., 2006)
Carcharhinidae	Sandbar shark	Carcharhinus plumbeus	VU	(Clarke et al., 2006)
Carcharhinidae	Tiger shark	Galeocerdo cuvier	NT	(Clarke et al., 2006)
Carcharhinidae	Blue shark	Prionace glauca	NT	(Clarke, 2008)
Sphyrnidae	Mallethead shark	Sphyrna corona	NT	(Clarke et al., 2007)
Sphyrnidae	Scalloped hammerhead	Sphyrna lewini	EN	(Clarke et al., 2007)
Sphyrnidae	Scoophead shark	Sphyrna media	DD	(Clarke et al., 2007)
Sphyrnidae	Great Hammerhead	Sphyrna mokarran	EN	(Clarke et al., 2007)
Sphyrnidae	Bonnethead shark	Sphyrna tiburo	LC	(Clarke et al., 2007)
Sphyrnidae	Smalleye Hammerhead	Sphyrna tudes	VU	(Clarke et al., 2007)
Sphyrnidae	Smooth Hammerhead	Sphyrna zygaena	VU	(Clarke et al., 2007)
Lamnidae	Shortfin Mako	Isurus oxyrhinchus	VU	(Clarke, 2008)
Alopiidae	Pelagic Thresher	Alopias pelagicus	VU	(Clarke, 2008)
Alopiidae	Bigeye Thresher	Alopias superciliosus	VU	(Clarke, 2008)
Alopiidae	Common Thresher	Alopias vulpinus	VU	(Clarke, 2008)
CR, Critically Endangered; EN, Endangered; VU, Vulnerable; NT, Near Threatened; LC, Least Concern; DD, Data Deficient.
References
Anonymous (2007) Inclusion of all species of the family Pristidae in Appendix I of CITES, CoP14 Prop. 17. http://www.cites.org/eng/cop/14/prop/E14-P17.pdf.
Clarke, S. C. (2008) Use of shark fin trade data to estimate historic total shark removals in the Atlantic Ocean. Aquatic Living Resources, 21, 373-381.
Clarke, S. C., McAllister, M. K., Milner-Gulland, E. J., Kirkwood, G. P., Michielsens, C. G. J., Agnew, D. J., Pikitch, E. K., Nakano, H. and Shivji, M. S. (2006) Global estimates of shark catches using trade records from commercial markets. Ecology Letters, 9, 1115-1126.
Clarke, S. C., Milner-Gulland, E. J. and Bjørndal, T. (2007) Social, economic and regulatory drivers of the shark fin trade. Marine Resource Economics, 22, 305-327.

## Sheet: B
Supplementary File 2B. Chondrichthyan species threatened by (i) control measures, and (ii) habitat destruction and degradation, pollution or climate change with the corresponding IUCN threat classification (Salafsky et al., 2008).
Family	Common name	Species name	Threat	IUCN Red List Category
(i) Control measures (12 species)
Carcharhinidae	Dusky shark	Carcharhinus obscurus	Capture in shark control nets (Control measures 5.4.5)	VU
Sphyrnidae	Scalloped hammerhead	Sphyrna lewini	Capture in shark control nets (Control measures 5.4.5)	EN
Sphyrnidae	Great hammerhead	Sphyrna mokarran	Capture in shark control nets(Control measures 5.4.5)	EN
Sphyrnidae	Smooth hammerhead	Sphyrna zygaena	Capture in shark control nets (Control measures 5.4.5)	VU
Alopiidae	Bigeye thresher	Alopias superciliosus	Capture in shark control nets (Control measures 5.4.5)	VU
Lamnidae	White shark	Carcharodon carcharias	Risk of shark attack (Control measures 5.4.5)	VU
Odontaspididae	Grey nurse shark	Carcharias taurus	Capture in shark control nets (Control measures 5.4.5)	VU
Cetorhinidae	Basking shark	Cetorhinus maximus	Due to damage caused to fishing nets (Control measures 5.4.5)	VU
Pristidae	Green sawfish	Pristis zijsron	Due to damage caused to fishing nets (Control measures 5.4.5)	CR
Rhynchobatidae	Giant wedgefish	Rhynchobatus djiddensis	Capture in shark control nets (Control measures 5.4.5)	VU
Rhinopteridae	Javanese cownose ray	Rhinoptera javanica	Capture in shark control nets (Control measures 5.4.5)	VU
Dasyatidae	Estuary stingray	Dasyatis fluviorum	Perceived predation on aquacultured molluscs (Control measures 5.4.5)	VU
(ii) Habitat Destruction & Degradation (24 Species), Pollution (22 Species), Climate Change (1 Species)
Carcharhinidae	Sandbar shark	Carcharhinus plumbeus	Residential & commercial development (Housing & urban areas 1.1)	VU
Carcharhinidae	Ganges shark	Glyphis gangeticus	Residential & commercial development (Commercial & industrial areas1.2; Dam construction & water control (Dams, size unknown 7.2.11)	CR
Carcharhinidae	Northern river shark	Glyphis garricki	Residential & commercial development (Housing & urban areas 1.1)	CR
Carcharhinidae	Speartooth shark	Glyphis glyphis	Residential & commercial development (Housing & urban areas 1.1); Pollution (Industrial & military effluents 9.2; Seepage from mining 9.2.2)	EN
Carcharhinidae	Irrawady river shark	Glyphis siamensis	Pollution (Domestic & urban waste water 9.1; Agricultural & forestry effluents 9.3.2; Soil erosion, sedimentation 9.3.4)	CR
Carcharhinidae	Broadfin shark	Lamiopsis temmincki	Residential & commercial development (Housing & urban areas 1.1)	EN
Scyliorhinidae	New Caledonia catshark	Aulohalaelurus kanakorum	Residential & commercial development (Housing & urban areas 1.1); Pollution (Industrial & military effluents 9.2; Agricultural & forestry effluents 9.3.2; Soil erosion, sedimentation 9.3.4), Climate change & severe weather (11.1 Habitat shifting & alteration)	VU
Scyliorhinidae	Brown shyshark	Haploblepharus fuscus	Residential & commercial development (Housing & urban areas 1.1); Pollution (Domestic & urban waste water 9.1)	VU
Scyliorhinidae	Natal shyshark	Haploblepharus kistnasamyi	Residential & commercial development (Commercial & industrial areas 1.2); Pollution (Domestic & urban waste water 9.1)	CR
Hemiscylliidae	Papuan epaulette shark	Hemiscyllium hallstromi	Pollution (Industrial & military effluents 9.2; Seepage from mining 9.2.2)	VU
Hemiscylliidae	Hooded carpet shark	Hemiscyllium strahani	Pollution (Industrial & military effluents 9.2; Seepage from mining 9.2.2)	VU
Narkidae	Ornate sleeper ray	Electrolux addisoni	Residential & commercial development (Housing & urban areas 1.1, Tourism & recreation areas 1.3); Pollution (Domestic & urban waste water 9.1; Industrial & military effluents 9.2)	CR
Rajidae	Pita skate	Okamejei pita	Residential & commercial development (Housing & urban areas 1.1); Dam construction & water control (Dams, size unknown 7.2.11); Pollution (Industrial & military effluents 9.2; Oil spills 9.2.1)	CR
Rhinobatidae	White-spotted guitarfish	Rhinobatos albomaculatus	Residential & commercial development (Housing & urban areas 1.1); Pollution (Domestic & urban waste water 9.1; Industrial & military effluents 9.2; Agricultural & forestry effluents 9.3.2)	VU
Rhinobatidae	Spineback guitarfish	Rhinobatos irvinei	Pollution (Domestic & urban waste water 9.1; Industrial & military effluents 9.2; Agricultural & forestry effluents 9.3.2)	VU
Pristidae	Freshwater sawfish	Pristis microdon	Dam construction & water control (large dams 7.2.10); Pollution (Industrial & military effluents 9.2; Seepage from mining 9.2.2; Agricultural & forestry effluents 9.3.2; Soil erosion, sedimentation 9.3.4; Herbicides & pesticides 9.3.3)	CR
Dasyatidae	Estuary stingray	Dasyatis fluviorum	Residential & commercial development (Housing & urban areas 1.1); Pollution (Industrial & military effluents 9.2; Seepage from mining 9.2.2)	VU
Dasyatidae	Smooth freshwater stingray	Dasyatis garouaensis	Residential & commercial development (Housing & urban areas 1.1)	VU
Dasyatidae	Mekong freshwater stingray	Dasyatis laosensis	Dam construction & water control (Dams, size unknown 7.2.11); Pollution (Agricultural & forestry effluents 9.3.2)	EN
Dasyatidae	Hortle's whipray	Himantura hortlei	Residential & commercial development (Housing & urban areas 1.1; Commercial & industrial areas 1.2; Tourism & recreation areas 1.3)	VU
Dasyatidae	Roughback whipray	Himantura kittipongi	Residential & commercial development (Housing & urban areas 1.1); Dam construction & water control (Dams, size unknown 7.2.11); Pollution (Domestic & urban waste water 9.1; Agricultural & forestry effluents 9.3.2; Herbicides & pesticides 9.3.3)	VU
Dasyatidae	Longnose marbled whipray	Himantura oxyrhyncha	Residential & commercial development (Housing & urban areas 1.1); Dam construction & water control (Large dams 7.2.10); Pollution (Domestic & urban waste water 9.1; Sewage 9.1.1; Industrial & military effluents 9.2; Agricultural & forestry effluents 9.3.2; Soil erosion, sedimentation 9.3.4; Herbicides & pesticides 9.3.3)	EN
Dasyatidae	Round whipray	Himantura pastinacoides	Residential & commercial development (Housing & urban areas 1.1); Mangrove destruction for shrimp farming in Southeast Asia (Agriculture & aquaculture 2; Marine & freshwater aquaculture 2.4; Industrial aquaculture 2.4.2); Pollution (Industrial & military effluents 9.2; Seepage from mining 9.2.2)	EN
Dasyatidae	Giant freshwater whipray	Himantura polylepis	Residential & commercial development (Housing & urban areas 1.1); Dam construction & water control (Large dams 7.2.10)	EN
Dasyatidae	White-edge freshwater whipray	Himantura signifer	Residential & commercial development (Housing & urban areas 1.1); Dam construction & water control (Dams, size unknown 7.2.11); Pollution (Domestic & urban waste water 9.1; Sewage 9.1.1; Industrial & military effluents 9.2; Agricultural & forestry effluents 9.3.2; Herbicides & pesticides 9.3.3)	EN
Dasyatidae	Reticulate whipray	Himantura uarnak	Residential & commercial development (Housing & urban areas 1.1); Mangrove destruction for shrimp farming in Southeast Asia (Agriculture & aquaculture 2; Marine & freshwater aquaculture 2.4; Industrial aquaculture 2.4.2); Pollution (Domestic & urban waste water 9.1)	VU
Dasyatidae	Bleeker's variegated whipray	Himantura undulata	Residential & commercial development (Housing & urban areas 1.1); Mangrove destruction for shrimp farming in Southeast Asia (Agriculture & aquaculture 2; Marine & freshwater aquaculture 2.4; Industrial aquaculture 2.4.2); Pollution (Domestic & urban waste water 9.1)	VU
Dasyatidae	Roughnose stingray	Pastinachus solocirostris	Residential & commercial development (Housing & urban areas 1.1); Mangrove destruction for shrimp farming in Southeast Asia (Agriculture & aquaculture 2; Marine & freshwater aquaculture 2.4; Industrial aquaculture 2.4.2); Pollution (Domestic & urban waste water 9.1)	EN
Reference
Salafsky, N., Salzer, D., Stattersfield, A. J., Hilton-Taylor, C., Neugarten, R., Butchart, S. H. M., Collen, B., Cox, N., Master, L. L., O'Connor, S. and Wilkie, D. (2008) A standard lexicon for biodiversity conservation: Unified classifications of threats and actions. Conservation Biology, 22, 897-911.

## Sheet: C
Supplementary File 2C. Irreplaceable: the 66 threatened endemic sharks and rays ordered in decreasing irreplaceability.
Order	Family	Species	IUCN Red List category	Extent of Occurrence (km2)	Irreplaceability
Carcharhiniformes	Scyliorhinidae	Atelomycterus baliensis	VU	707	0.333
Carcharhiniformes	Triakidae	Triakis acutipinna	EN	14682	0.25
Rajiformes	Dasyatidae	Dasyatis colarensis	VU	11073	0.25
Rajiformes	Dasyatidae	Himantura kittipongi	EN	36740	0.25
Rajiformes	Rajidae	Zearaja maugeana	EN	354	0.25
Rajiformes	Rhinobatoidei	Trygonorrhina melaleuca	EN	13262	0.25
Rajiformes	Dasyatidae	Dasyatis garouaensis	VU	92503	0.167
Rajiformes	Dasyatidae	Himantura signifer	EN	204	0.167
Rajiformes	Rhinobatoidei	Aptychotrema timorensis	VU	3306	0.143
Rajiformes	Rhinobatoidei	Rhinobatos jimbaranensis	VU	23836	0.143
Rajiformes	Urotrygonidae	Urotrygon reticulata	VU	24236	0.143
Rajiformes	Rajidae	Dipturus crosnieri	VU	22480	0.125
Rajiformes	Urotrygonidae	Urotrygon simulatrix	VU	24660	0.125
Rajiformes	Rajidae	Okamejei pita	CR	13128	0.111
Rajiformes	Urolophidae	Urolophus javanicus	CR	23920	0.111
Carcharhiniformes	Carcharhinidae	Glyphis glyphis	EN	880	0.1
Carcharhiniformes	Scyliorhinidae	Aulohalaelurus kanakorum	VU	15626	0.1
Rajiformes	Dasyatidae	Dasyatis laosensis	EN	50485	0.083
Rajiformes	Rhynchobatidae	Rhynchobatus springeri	VU	18994	0.071
Carcharhiniformes	Carcharhinidae	Glyphis siamensis	CR	65725	0.067
Rajiformes	Dasyatidae	Himantura hortlei	VU	97943	0.063
Carcharhiniformes	Carcharhinidae	Carcharhinus leiodon	VU	63549	0.056
Carcharhiniformes	Scyliorhinidae	Haploblepharus kistnasamyi	CR	5666	0.056
Rajiformes	Narcinidae	Diplobatis colombiensis	VU	60085	0.053
Rajiformes	Rhinobatoidei	Rhinobatos penggali	VU	117792	0.05
Rajiformes	Narcinidae	Benthobatis yangi	VU	7710	0.048
Rajiformes	Rajidae	Dipturus mennii	VU	22427	0.042
Rajiformes	Narcinidae	Benthobatis kreffti	VU	55447	0.04
Rajiformes	Narkidae	Electrolux addisoni	CR	27260	0.034
Carcharhiniformes	Scyliorhinidae	Galeus mincaronei	VU	58255	0.033
Rajiformes	Myliobatidae	Myliobatis hamlyni	EN	15454	0.031
Rajiformes	Rajidae	Gurgesiella dorsalifera	VU	172092	0.024
Orectolobiformes	Hemiscylliidae	Hemiscyllium strahani	VU	160575	0.021
Rajiformes	Urolophidae	Urolophus orarius	EN	170656	0.018
Rajiformes	Dasyatidae	Himantura fluviatilis	EN	50057	0.016
Rajiformes	Narcinidae	Diplobatis pictus	VU	277658	0.015
Rajiformes	Narcinidae	Diplobatis guamachensis	VU	187797	0.014
Rajiformes	Rhinopteridae	Rhinoptera brasiliensis	EN	249549	0.013
Rajiformes	Rhinobatoidei	Rhinobatos formosensis	VU	90151	0.012
Carcharhiniformes	Triakidae	Scylliogaleus quecketti	VU	98904	0.012
Rajiformes	Rajidae	Leucoraja melitensis	CR	306681	0.012
Rajiformes	Narkidae	Temera hardwickii	VU	245759	0.011
Orectolobiformes	Brachaeluridae	Heteroscyllium colcloughi	VU	159978	0.011
Carcharhiniformes	Carcharhinidae	Glyphis garricki	CR	337245	0.01
Rajiformes	Rajidae	Dipturus australis	VU	109998	0.01
Rajiformes	Urolophidae	Urolophus sufflavus	VU	115284	0.009
Carcharhiniformes	Scyliorhinidae	Haploblepharus fuscus	VU	134947	0.008
Orectolobiformes	Hemiscylliidae	Hemiscyllium hallstromi	VU	312286	0.008
Rajiformes	Dasyatidae	Himantura lobistoma	VU	166992	0.008
Rajiformes	Narkidae	Heteronarce garmani	VU	192141	0.008
Rajiformes	Rhinobatoidei	Zapteryx brevirostris	VU	384489	0.008
Rajiformes	Narcinidae	Narcine brevilabiata	VU	254842	0.007
Rajiformes	Arhynchobatidae	Sympterygia acuta	VU	429193	0.007
Carcharhiniformes	Scyliorhinidae	Schroederichthys saurisqualus	VU	272135	0.006
Rajiformes	Arhynchobatidae	Atlantoraja castelnaui	EN	405956	0.005
Rajiformes	Arhynchobatidae	Atlantoraja cyclophora	VU	475568	0.005
Carcharhiniformes	Scyliorhinidae	Holohalaelurus favus	EN	105075	0.005
Carcharhiniformes	Scyliorhinidae	Holohalaelurus punctatus	EN	322453	0.005
Rajiformes	Urolophidae	Urolophus bucculentus	VU	276322	0.005
Rajiformes	Dasyatidae	Pastinachus solocirostris	EN	345610	0.004
Squatiniformes	Squatinidae	Squatina punctata	EN	312543	0.004
Squatiniformes	Squatinidae	Squatina occulta	EN	313440	0.004
Rajiformes	Urolophidae	Urolophus viridis	VU	394258	0.004
Squatiniformes	Squatinidae	Squatina tergocellatoides	VU	168966	0.003
Squatiniformes	Squatinidae	Squatina guggenheim	EN	470421	0.002
Squatiniformes	Squatinidae	Squatina formosa	EN	187601	0.002
Endemics were defined as those species with a geographic range (Extent of Occurance less than 500,000 km2. Irreplaceability is the sum of the inverse of the geographic range sizes of all threatened endemic species in the cell. A value of 0.1 means that on average a single cell represents one tenth of the global range of the species.
